# Supplementary material
Source: Springer Nature journal article supplement (https://www.springermedizin.de/resource/supplementary/12943_2011_934_MOESM2_ESM.pdf/9551710)
Supplement: MOESM2 [file 9551710]

**A.****B.****C.**
